# Supplementary material for: Taking a Call Is Facilitated by the Multisensory Processing of Smartphone Vibrations, Sounds, and Flashes
Source: PLOS journal article supplement (doi:10.1371/journal.pone.0103238), 2014-08-12
Supplement: S1 (10.1371/journal.pone.0103238.s001) [file journal.pone.0103238.s001]

Date: \_\_\_\_\_

Participant: \_\_\_\_\_

**Questionnaire: Multisensory processing of smartphone stimuli**

**A. Personal information**

1. Gender:

female

male

2. Age: \_\_\_\_\_ years

**B. Information about smartphone use**

1. I own a smartphone / mobile phone

yes

no (please skip to part D)

2. I have owned it for approx. \_\_\_\_\_ months

Current model: \_\_\_\_\_

3. If you have switched phones recently, please provide information about the previous model and when you switched:

Previous model: \_\_\_\_\_

Switched \_\_\_\_\_ months ago

4. My smartphone / mobile phone can connect to the internet

yes

no

5. I use my smartphone / mobile phone on a...

daily

weekly

monthly

less than monthly

...basis

6. If you use your smartphone / mobile phone on a daily basis, how much time do you approx. spend on the the following activities...

(in minutes)

Telephoning.....approx. \_\_\_\_\_ mins

|                                   |                    |
|-----------------------------------|--------------------|
| SMS.....                          | approx. _____ mins |
| eMail.....                        | approx. _____ mins |
| Facebook(and similar).....        | approx. _____ mins |
| WhatsApp(and similar).....        | approx. _____ mins |
| Instagram(and similar).....       | approx. _____ mins |
| Twitter(and similar).....         | approx. _____ mins |
| General surfing the internet..... | approx. _____ mins |
| Games.....                        | approx. _____ mins |
| Skype.....                        | approx. _____ mins |
| Music.....                        | approx. _____ mins |
| Photos.....                       | approx. _____ mins |
| Managing appointments.....        | approx. _____ mins |
| Other (please specify) _____      | approx. _____ mins |

7. My monthly bill is approx. \_\_\_\_\_ Euros

8. I usually carry my smartphone / mobile phone...

- in my handbag
- in my trouser pocket
- other (please specify): \_\_\_\_\_

9. While telephoning I usually hold my smartphone / mobile phone...

- with my right hand
- with my left hand

10. For other activities on my smartphone / mobile phone (e.g. typing, surfing), I usually hold my phone...

- with my right hand
- with my left hand

### C. Information about smartphone settings

A) For calls:

1. Ringtone

- Classic ringtone (already installed on the device)
- Custom ringtone (e.g. music, sound, etc.)

2. Description of the classic ringtone (for non-personalised calls):

\_\_\_\_\_

3. The volume-strength for my ringtone is set in the

- lowest  $\frac{1}{4}$
- second  $\frac{1}{4}$
- third  $\frac{1}{4}$
- highest  $\frac{1}{4}$

...of my phone's volume control bar

4. The vibration function of my smartphone / mobile phone is activated

- yes
  - vibrates with ringtone
  - vibrates without ringtone
- no

5. The vibration strength is:

- weak
- medium
- strong

B) For SMS and other notifications:

7. Notification tone

- Classic tone (already installed on the device)
- Custom tone (e.g. music, sound, etc.)

8. Description of the classic ringtone (for non-personalised calls):

---

9. The volume-strength for my ringtone is set in the

- lowest  $\frac{1}{4}$
- second  $\frac{1}{4}$
- third  $\frac{1}{4}$
- highest  $\frac{1}{4}$

...of my phone's volume control bar

10. The vibration function of my smartphone / mobile phone is activated

- yes
  - vibrates with ringtone
  - vibrates without ringtone
- no

11. The vibration strength is:

- weak
- medium
- strong

#### **D. Statements about (my) smartphone(s)**

Please circle the number that reflects your opinion most accurately:

**1- I fully disagree**

**2- I partly disagree**

- 3- I don't know
- 4- I partly agree
- 5- I fully agree

1. A smartphone is important for maintaining social interaction.

Fully disagree 1 --- 2 --- 3 --- 4 --- 5 Fully agree

2. A smartphone is important work interactions.

Fully disagree 1 --- 2 --- 3 --- 4 --- 5 Fully agree

3. I predominantly use my / a phone in a private capacity.

Fully disagree 1 --- 2 --- 3 --- 4 --- 5 Fully agree

4. I predominantly use my / a phone in a work capacity.

Fully disagree 1 --- 2 --- 3 --- 4 --- 5 Fully agree

5. I often look at my smartphone, even if nothing happens.

Fully disagree 1 --- 2 --- 3 --- 4 --- 5 Fully agree

6. I regularly purchase new smartphone models.

Fully disagree 1 --- 2 --- 3 --- 4 --- 5 Fully agree

7. I use many smartphone apps and regularly download new ones.

Fully disagree 1 --- 2 --- 3 --- 4 --- 5 Fully agree

8. Sometimes I think that my smartphone rings / vibrates, even though it does not.

Fully disagree 1 --- 2 --- 3 --- 4 --- 5 Fully agree

### E. Further information

1. During the experiment I employed a specific strategy

yes

no

If yes, please specify:

---

---

2. I play computer / console games.

yes, approx. \_\_\_\_\_ hours per \_\_\_\_\_.

no
